# Supplementary material for: Net ozone production and its relationship to NO x and VOCs in the marine boundary layer around the Arabian Peninsula
Source: Copernicus journal article supplement (doi:10.5194/acp-2019-1031), 2019-12-03
Supplement: Supplementary file [file acp-2019-1031-AC2-supplement.pdf]

## Reply to Reviewer Report 2

*In the following the comments of the reviewer are presented (black) alongside with our replies (in blue) and changes made to the manuscript (in red).*

General statement: The authors have a very interesting data set. I'm not familiar with the chemistry of this region but I assume there are few high quality NO<sub>x</sub> measurements and perhaps no radical measurements. Analysis is through the use of deviations from the Leighton photostationary state to get peroxy radical concentrations which are then used in conjunction with measured NO to obtain ozone production rates. Observed OH and HO<sub>2</sub> are presented only via a color-coded ship track. As far as I can tell, the only use of the observed OH and HO<sub>2</sub> is to determine loss rates of ozone which when added to the PSS ozone production rate yields a net ozone production rate. The ratio of HCHO to NO<sub>x</sub> (both observed quantities) is used as an indicator ratio to predict regions in which O<sub>3</sub> production is either NO<sub>x</sub> or VOC sensitive.

Comparisons are made with a Eulerian model for NO<sub>x</sub>, ozone, and RO<sub>2</sub> mixing ratios as well as for net O<sub>3</sub> production rate. This article contains the quantum of information to warrant publication. I can only guess that either they want to write up the radical and HCHO measurements in a separate study or that they are uninterruptable for one reason or another.

I found the article difficult to follow in places. It is my belief that the authors have underestimated the uncertainty of the instruments used to determine peroxy radicals. The authors need to re-examine their error propagation formula. I am calling this a major revision as it affects the most prominent results in the paper. In practice it can be done in an afternoon. They could also compare the PSS value of RO<sub>2</sub> with measured HO<sub>2</sub> (which is stated to be preliminary due to an up to 20% interference by RO<sub>2</sub>). This is a reality test.

Dear reviewer, thank you very much for reviewing our manuscript and for the insightful comments. Below we provide detailed responses to your comments. Please note that PSS RO<sub>2</sub> has been compared to HO<sub>2</sub> in Sect. 3.2, P 21 L450.

Comment 1: line 124 "UV-induced positive bias in the NO<sub>2</sub> measurements due to photolysis of HONO, BrONO<sub>2</sub>, NO<sub>3</sub> and ClNO<sub>2</sub> to produce NO was characterized ahead of the campaign to be 7.7 %, 7.2 %, 5.6 % and 1.5 % of the respective ambient concentration of HONO, BrONO<sub>2</sub>, NO<sub>3</sub> and ClNO<sub>2</sub> respectively,"

(Italics mine). No where in the paper is it mentioned that these species are measured. Have interferences been determined based on model-calculated or typical concentrations? Or do these figures represent the percent interference if the interferent has the same concentration as NO?

We have used absorption cross sections from the MPI-Mainz UV/VIS Spectral Atlas of Gaseous Molecules (Keller-Rudek et al., 2013) for the estimation of the parallel interference. The particular photolysis rate of NO<sub>2</sub> and the regarded NO<sub>y</sub>-compound was calculated by (Eq. 1)

$$j = \int F(\lambda, T) \cdot \sigma(\lambda, T) \cdot \varphi(\lambda) d\lambda, \quad (1)$$

where  $F(\lambda, T)$  is the spectral emission of the UV LEDs,  $\sigma(\lambda, T)$  the absorption cross section and  $\varphi(\lambda)$  the quantum yield. For the calculation of the photolysis rate of the particular NO<sub>y</sub>-compound the respective quantum yield was conservatively estimated to be equal 1, yielding an upper limit for the interference. On Page 5, L 124 now it says: **The UV-induced positive bias in the NO<sub>2</sub>-measurement due to photolysis of HONO, BrONO<sub>2</sub>, NO<sub>3</sub> and ClNO<sub>2</sub> to produce NO was estimated at 7.7 %, 7.2 %, 5.6 % and 1.5 %, respectively, based on the absorption cross sections from the MPI-Mainz UV/VIS Spectral Atlas of Gaseous Molecules (Keller-Rudek et al., 2013). These values represent upper limits for the interference of the respective NO<sub>y</sub> compound as the respective molecular quantum yield was estimated conservatively at 1. Note that the values represent percent interferences if the interferent had the same concentration**

as NO<sub>2</sub>. Due to small daytime concentrations of these molecules in the MBL, a UV-induced bias was neglected for the observations in this study.

Comment 2: line 181 NO<sub>2</sub> was further measured by cavity ring-down spectroscopy (Sobanski et al., 2016) and used for correcting the instrumental background of the CLD NO<sub>2</sub> data, as described above (the correction was taken as the ultimate absolute measurement uncertainty in the CLD NO<sub>2</sub> data).

The uncertainty of the NO<sub>2</sub> chemiluminescent measurement is not equal to that of the cavity ring-down instrument. The chemiluminescent NO<sub>2</sub> is the difference between two measurements, one of which gets divided by 0.294 to take into account photolysis efficiency. In order to add errors in quadrature, I need to know the NO to NO<sub>2</sub> ratio. I'm guessing that the relative uncertainty of NO<sub>2</sub> will be at least twice that of NO. The NO<sub>2</sub> chemiluminescent measurement is affected adversely by the relatively low photolysis efficiency. That accounts for random errors in NO<sub>2</sub>. Comparison with the cavity ringdown may take care of the NO<sub>2</sub> instrumental background but how does it take care of the random errors?

Random errors are taken up by the calculation of a one-minute average before the instrumental background was estimated from the difference in the two NO<sub>2</sub> measurements. Note that random errors in the data are expected to be reduced as our final data analysis is based on a five minute average. NO<sub>2</sub> is calculated by

$$\text{NO}_2 = \frac{\text{NO}_c - \text{NO}}{K_e},$$

where NO<sub>c</sub> is the signal of the channel equipped with the photolytic converter, NO the signal of the NO-channel and K<sub>e</sub> the NO<sub>2</sub> conversion efficiency. We agree that the relative uncertainty in the NO<sub>2</sub> has to be estimated by means of the largest error possible from the relative uncertainties of NO (6 %), NO<sub>c</sub> (6 %) and the conversion efficiency K<sub>e</sub> (3 %) rather than only from the uncertainty of the NO<sub>c</sub>-signal and the uncertainty of the conversion efficiency. The revised TMU for NO<sub>2</sub> follows as:

$$\Delta\text{NO}_2 = \sqrt{\Delta\text{NO}^2 + \Delta\text{NO}_c^2 + \Delta K_e^2} = \sqrt{6\%^2 + 6\%^2 + 3\%^2} = 9\%.$$

We also agree that the absolute error of a single NO<sub>2</sub> data point might exceed 9 % when NO<sub>2</sub> is calculated from two high numbers (e.g. if we assume 100 ppb<sub>v</sub> NO and 101 ppb<sub>v</sub> NO<sub>c</sub>, NO<sub>2</sub> would be ~ 4 ppb<sub>v</sub>), the error in NO<sub>2</sub> would be underestimated by 9 %. However the average and the median relative uncertainty of each data point of the campaign at 5 minute integration time are 13.6 % and 11.8 %, respectively, which is indeed slightly higher than the statistical estimate of 9 %. However the above average of 13.6 % yields a standard deviation of 6.9 %, which yields that both the average and the median relative uncertainty of NO<sub>2</sub> are significantly not different from the statistical estimate of 9 %. As we finally calculate median values for days and regions, it is more practicable to estimate a statistical error for the NO<sub>2</sub> measurement at 9 %. The manuscript has been explicitly revised on Page 7, L 162. Now it says: **The TMU in NO<sub>2</sub> has been estimated by means of the largest error possible from error propagation at**

$$\Delta\text{NO}_2 = \sqrt{\Delta\text{NO}^2 + \Delta\text{NO}_c^2 + \Delta K_e^2} = \sqrt{6\%^2 + 6\%^2 + 3\%^2} = 9\%$$

**at a confidence level of 1σ and an integration time of five minutes.**

Also the TMU of NO<sub>2</sub> in Table 2 has been corrected to 9 %.

Line 205 Total Measurement Uncertainty. All of these numbers appear very optimistic. In a previous comment, I gave my reasons why the TMU of NO<sub>2</sub> appeared low. I do not know why the TMU of HO<sub>2</sub> is not larger than OH. There are many sources of uncertainty in the conversion of HO<sub>2</sub> to OH which is the quantity actually measured. The authors state a 20% bias due to RO<sub>2</sub> chemistry. I do not know to what extent quantification of HO<sub>2</sub> is made easier than that of OH because there is more HO<sub>2</sub> than OH and hence a larger signal.

The 1 sigma accuracy of OH is 20 % and the average precision is  $3.4 \cdot 10^5$  molec cm<sup>-3</sup>. The accuracy of HO<sub>2</sub> is 20 % and the largest uncertainty due to interference by contribution of RO<sub>2</sub> is 7 % or 3 pptv, whichever is higher. The average precision of HO<sub>2</sub> is 3 pptv. The uncertainty in OH is estimated as the 1 sigma accuracy whereas the uncertainty in HO<sub>2</sub> is estimated at  $\sqrt{(20\%)^2 + (7\%)^2} \approx 21\%$ . Note that HO<sub>2</sub> is calculated as the difference from two signals: HO<sub>2</sub> = (HO<sub>2</sub> + OH) – OH, whereas the signal (HO<sub>2</sub>+OH) is about two order of magnitude larger than the signal from OH, which means that the uncertainty in OH can be neglected in the determination of the uncertainty in HO<sub>2</sub>. On page 8, L 196-200 now it says: HO<sub>2</sub> data used in this study is still preliminary due to not yet corrected interference of organic peroxy radicals RO<sub>2</sub>. The largest uncertainty due to interference by contribution of RO<sub>2</sub> is 7 % or 3 pptv, whichever is higher. The 1 sigma accuracy of both OH and HO<sub>2</sub> is 20 %. The uncertainty in the OH data is here estimated as the 1 sigma accuracy of the data set at 20 %, whereas the uncertainty in HO<sub>2</sub> is estimated at  $\sqrt{(20\%)^2 + (7\%)^2} \approx 21\%$ . The measurement uncertainty for HO<sub>2</sub> has been corrected to 21 % in Table 2.

Comment 3: Line 272 “In low NO<sub>x</sub> environments (< 100 pptv) previous studies have indicated that further NO oxidizing trace gases such as peroxy radicals (HO<sub>2</sub>, RO<sub>2</sub>) and halogen monoxides (XO) may result in a deviation from unity (Nakamura et al., 2003; Hosaynali Beygi et al., 2011; Reed et al., 2016).”

Deviations from the Leighton relation can also be important at higher NO. Departures of the Leighton ratio from unity depend (primarily) on the competition between HO<sub>2</sub>+NO and O<sub>3</sub>+NO. In polluted environments, HO<sub>2</sub> concentrations can increase, remain steady, or decrease only slowly as NO is increased.

Several studies address deviations from the Leighton Ratio. However in high NO<sub>x</sub> regimes gaps between measurement and estimate can be closed by incorporating higher oxidations (HO<sub>2</sub>, halogen monoxides). However, in low NO<sub>x</sub> regimes, even addressing these further oxidants does not close the gap between observation and estimate (see for instance Hosaynali Beygi et al., 2011). We have added the following sentence Page 10, L 245: Deviations from expected NO/NO<sub>2</sub>-ratios at low NO<sub>x</sub> generally refer to missing oxidants converting NO to NO<sub>2</sub> (Hosaynali Beygi et al., 2011; Reed et al., 2016) or to a measurement error due to an instrumental background or a positive interference from thermal labile NO<sub>x</sub> reservoir species (Reed et al., 2016; Silvern et al., 2018).

Line 250 and following. Does Fig. S1 show the ratio of actinic flux in the 4 hour window centered around noon to the total measured actinic flux? Or is Fig. S1 a ratio obtained by fitting a Gaussian, between zeroes in the AM and PM?

You are right, Figure S1 shows the ratio of the actinic flux in the 4 hour window (centered to noon) to the total measured actinic flux of that particular day. The Gaussian Fit was only used to estimate noontime of each particular day. We have revised caption of Figure S1. Now the first sentence of the caption of supplementary Figure S1 says: Ratio of the noontime actinic flux ( $\pm$  2h around noon) with regard to the total actinic flux  $j(\text{NO}_2)$  of that particular day.

Comment 4: Lines 266-270, typos for O singlet D. Elsewhere, the “1” is in its proper place as a superscript.

Thank you for noticing. Now it says on Page 11, Line 276:  $\text{O}(^1\text{D}) + \text{H}_2\text{O} \rightarrow 2\text{OH}$

Comment 5: Line 285. Am I correct that insofar as ozone production is concerned the only use of the HO<sub>2</sub> and OH measurements is their contribution to the loss rate of ozone (and hence their effect on net ozone production)?

HO<sub>x</sub> data have been used to calculate net ozone production rates, however HO<sub>2</sub> has also been used as a reality test: The peroxy radical estimate based on Eq. 3 was compared to measured HO<sub>2</sub> in Section 3.2 (Page 21, L 450).

Comment 6: Line 373. "We find that the median NO<sub>x</sub>(model)/NO<sub>x</sub>(measurement)-ratio throughout the whole campaign is 0.91, indicating that the model underestimates NO<sub>x</sub> by roughly 10 %." The median of what? Could you please specify what items you are taking the median of; i.e., what are the data points. Ratios by Region? Days? Individual data points. I may have missed it; how long are data points? Equal to the 5 minute instrument averaging time?

The median NO<sub>x</sub>(model)/NO<sub>x</sub>(measurement) has been calculated as the median of five minute individual data points of the whole data set of the campaign. We have cleared out the misunderstanding in the text, now it says on Page 17, L395-396 following: We find that the median NO<sub>x</sub>(model)/NO<sub>x</sub>(measurement)-ratio of all five minute averaged data points of the whole campaign is 0.91, indicating that the model underestimates NO<sub>x</sub> by roughly 10 %.

Comment 7: Line 391. "Noontime RO<sub>2</sub> was estimated based on Eq. 3. As the steady state assumption will not hold for air masses originating from fresh emissions (times to acquire steady state estimated from the inverse sum of the loss and production terms for NO<sub>2</sub> typically ranged from 1-2 minutes during AQABA) and for fast changes in the actinic flux," What I think you want to say is mis-stated. As written, it says: We can't use samples that had fresh emissions, so we used samples taken when actinic flux was slowly changing. Was the data screened to eliminate time periods in which NO<sub>x</sub> (or less likely O<sub>3</sub>) was rapidly varying? From the looks of the actinic flux plot you did not have many clouds giving rapid variations in jNO<sub>2</sub>. I would be surprised if the time window around noon could not have been wider. How much does jNO<sub>2</sub> change between, say noon-3 hours and noon – 175 minutes and what change in HO<sub>2</sub> does that produce?

Please note that before performing photochemistry calculation, the whole data set was filtered based on a stack filter which was established based on parameters such as wind direction, wind speed, variability in NO data, O<sub>3</sub>, SO<sub>2</sub> (see Lines 209-211). However rapid changes in the actinic flux  $j(\text{NO}_2)$  were observed e.g. after sunrise and before sunset. For  $\pm 2\text{h}$  around noon the variation of the actinic flux (within the 4 hour period) was about 7 %, whereas the variation of the actinic flux within a 6-hour window ( $\pm 3\text{h}$  around noon) would be at least 20 % and assumptions that the actinic flux does not change within this time frame would not have been supportable. Differences in the actinic flux between noon-3 hours and noon-175 minutes would already be about 2 % of the maximum noontime value (and about the same change in HO<sub>2</sub>). Differences in the actinic flux between noon-2 hours and noon-115 minutes would also be about 1-2 % of the maximum noontime value (slightly less than for 6 hours), but however expecting to decrease to zero towards noontime. Constant RO<sub>2</sub> and NOPR can be rather assumed for a 4-hour window around noon than for a 6-hour window around noon.

Comment 8: Figure 6. Obtaining peroxy radical concentrations from photostationary state calculations is not easy. Line 413 "the total uncertainty in the RO<sub>2</sub> estimates is estimated at 14%. This is a way too optimistic estimate of the uncertainty of RO<sub>2</sub>. Instrument precision is too high and no account (except for NO<sub>2</sub>) is taken of biases. Even still, the PSS is a difference in two numbers, often of comparable magnitude. I'm not certain the error propagation was correctly performed. I would like to see the formula that represents "errors added in quadrature". Compare those results with a simple Monte Carlo calculation that can be done on a spreadsheet. And keep in mind that the result will not take into account errors in rate constants.

We agree that obtaining RO<sub>2</sub> from PSS calculations is not trivial and very much depends on the errors of the used quantities. The TMU in RO<sub>2</sub> was estimated based on Gaussian error propagation by means of the estimate of the largest error possible. RO<sub>2</sub> is calculated by

$$[\text{RO}_2] = \frac{j(\text{NO}_2) \cdot [\text{NO}_2] - k_{\text{NO}+\text{O}_3} \cdot [\text{NO}][\text{O}_3]}{k_{\text{NO}+\text{HO}_2} \cdot [\text{NO}]}$$

The relative uncertainty in the RO<sub>2</sub> data has to be calculated from the relative uncertainty of NO, NO<sub>2</sub>, O<sub>3</sub> and j(NO<sub>2</sub>) at roughly 6 %, 9 % (instead of 7 %), 2 % and 10 %, respectively, which yields a relative uncertainty of 15 % for RO<sub>2</sub>.

$$\Delta RO_2 = \sqrt{\Delta NO^2 + \Delta NO_2^2 + \Delta O_3^2 + \Delta j(NO_2)^2} = \sqrt{6\%^2 + 9\%^2 + 2\%^2 + 10\%^2} \approx 15 \%$$

The relative uncertainty in RO<sub>2</sub> has been revised in the manuscript, now it says on Page 20 line 434-437: **Based on the total measurement uncertainties of the measured quantities in Eq. 3, the uncertainty in RO<sub>2</sub> is estimated by means of the largest error possible at 15 %.**

$$\Delta RO_2 = \sqrt{\Delta NO^2 + \Delta NO_2^2 + \Delta O_3^2 + \Delta j(NO_2)^2} = \sqrt{6\%^2 + 9\%^2 + 2\%^2 + 10\%^2} \approx 15 \% \quad (9)$$

**Note that our calculation assumes that errors in the used rate coefficients are negligible.**

Comment 9: Line 416. “Negative values for all regions are regularly found in the vicinity of fresh emissions and air masses not in photochemical equilibrium” That might be the explanation. It would be useful to quantify this point. HO<sub>2</sub> and RO<sub>2</sub> concentrations will be low in a high NO<sub>x</sub> environment. The negative values may reflect the measurement accuracy needed to distinguish, for example, – 5 ppt RO<sub>2</sub> from zero.

Note that the uncertainty of the best estimates of RO<sub>2</sub> for each day/each region is estimated at 15 %. A reason why negative values were regularly found in the vicinity of fresh emissions is that the assumption of photostationary steady state (PSS) might not be fulfilled for fresh emissions. Time to acquire PSS was estimated as the inverse sum of the loss and production terms of NO<sub>2</sub> and was of the order of 1-2 minutes during AQABA, depending on the particular conditions (temperature, radiation, ozone concentration). The assumption that the regarded air masses were in PSS might not be true in the vicinity of fresh emissions (with transport time from source to instrument of less than 2 minutes). For these air masses production of NO<sub>2</sub> (oxidation of NO) prevailed over photolysis of NO<sub>2</sub> leading to  $j(NO_2) \cdot [NO_2] - k_{NO+O_3} \cdot [NO][O_3] < 0$ . Negative values might hence simply reflect that the regarded air mass has not reached PSS.

Comment 10: Figure 7. Here the RO<sub>2</sub> data looks much better. There are differences mentioned in the text. but for this reader could you please provide a concise reason why Fig. 7. looks so much better than Fig. 6. Is it the data groupings? I assume that in both Fig. 6 and 7. the blue RO<sub>2</sub> data is from Eq. 3. I am not totally positive because you were measuring HO<sub>2</sub> and some fraction of RO<sub>2</sub>.

Figure 7 has been processed based on five minute data points in each region whereas Figure 6 has been processed for single days which might be more biased by single data outliers. Grouping into regions rather than for single days allows for a statistically more established estimate.

Comment 11: Line 421. As peroxy radicals are short-lived molecules generated from the oxidation of VOCs, enhanced RO<sub>2</sub> concentrations observed over the Arabian Gulf are most likely due to high VOC observed over the Arabian Gulf are most likely due to high VOC emissions from intense oil and gas activities in the region. High HO<sub>2</sub> can also occur in aged air masses in which NO<sub>x</sub> and VOCs have reacted away but still have significant O<sub>3</sub> and (perhaps) HCHO. Photolysis could then yield peroxy radicals.

We have added the comment to the manuscript on Page 21, L. 447,448. **However high HO<sub>2</sub> and RO<sub>2</sub> can also occur in aged air massed with low NO<sub>x</sub> and VOCs but still significant O<sub>3</sub> (and perhaps HCHO whose photolysis would then yield peroxy radicals).**

Comment 12: Line 440. Regarding the extrapolated actinic flux curve to get a daily ozone production.  $j(O^1D)$  decreases early and late in the day faster than  $J(NO_2)$ . Not sure how much difference it makes. I would be very leery of this extrapolation over land; I'm assuming that you are far enough away that varying traffic and boundary layer heights are not a concern.

Except for  $j(O^1D) \cdot \alpha \cdot [O_3]$  all other terms will scale with  $j(NO_2)$ . However errors due to a different diurnal profiles of  $j(O^1D)$  will remain insignificant with respect to the relative uncertainty of NOPR, as NOPR are mainly determined by  $k \cdot [NO] \cdot [RO_2]$  and loss reactions due to OH and  $HO_2$ .

Comment 13: Line 455 "the uncertainty of the regional NOPR is 40 % which has been estimated by error propagation" I don't disagree with this value. Merely surprised at its magnitude compared to a 15% uncertainty for  $RO_2$  from Eq. 3.

The uncertainty in NOPR was estimated by means of the largest error possible and is mainly driven by the high uncertainty in OH and  $HO_2$  (each 20 %) and by the uncertainty in  $RO_2$  (15 %). Diurnal net ozone production rates were estimated by scaling the median hourly noontime value to a diurnal value (by multiplying by the hourly value by 4 due to a 4-hour window around noon and by further dividing by 0.461 (noontime fraction ( $\pm 2h$ ) of  $j(NO_2)$ ). Strictly speaking, the relative uncertainty (6 %) in the division by 0.461, referred to as  $\Delta s$  (see Supplements Figure 1), also needs to be accounted for when estimating the uncertainty in NOPR. Also the error in  $\alpha$  (Eq. 5) is rather determined by the error in  $H_2O$  (5 %) than from its relative variation over the campaign (relative variation  $\sim 21$  %). This yields a measurement uncertainty for NOPR of

$$\Delta NOPR = \sqrt{\Delta NO^2 + \Delta NO_2^2 + \Delta O_3^2 + \Delta j(NO_2)^2 + \Delta j(O^1D)^2 + \Delta \alpha^2 + \Delta RO_2^2 + \Delta OH^2 + \Delta HO_2^2 + \Delta s^2}$$

$$= \sqrt{6\%^2 + 9\%^2 + 2\%^2 + 10\%^2 + 10\%^2 + 5\%^2 + 15\%^2 + 20\%^2 + 20\%^2 + 6\%^2} \approx 38 \%$$

We have corrected the error in NOPR from 40 % to 38 % in the manuscript and specified error calculation in detail also for NOPR in the manuscript.

On Page 12, L281 now it says: The error in  $\alpha$  is mainly determined by the error of  $H_2O$  at 5 %.

On Page 21, L463 now it says: These noontime values are scaled to diurnal production rates (Figure 8). As photochemical net ozone production is in good approximation linear with actinic flux  $j(NO_2)$  and as on average ( $46.1 \pm 2.8$  %) of the total  $j(NO_2)$  occurred  $\pm 2h$  around noon, the median noontime NOPR estimate was multiplied by  $4/0.461 \approx 8.68$  to obtain a diurnal value. The error in the total actinic flux located  $\pm 2h$  around noon is estimated from the standard deviation of the best estimate of 0.461 at  $\Delta s \approx 6$  %.

On Page 23, L 455 now it says: Based on the total measurement uncertainties of the measured quantities in Eq. 3, the systematic error in NOPR is estimated from error propagation by means of the largest error possible at 38 %.

$$\Delta NOPR = \sqrt{\Delta NO^2 + \Delta NO_2^2 + \Delta O_3^2 + \Delta j(NO_2)^2 + \Delta j(O^1D)^2 + \Delta \alpha^2 + \Delta RO_2^2 + \Delta OH^2 + \Delta HO_2^2 + \Delta s^2}$$

$$= \sqrt{6\%^2 + 9\%^2 + 2\%^2 + 10\%^2 + 10\%^2 + 5\%^2 + 15\%^2 + 20\%^2 + 21\%^2 + 6\%^2} \approx 38 \%$$

Comment 14: Line 473. "Although EMAC predicts high ozone levels over the Arabian Sea, it also reports the lowest NOPR in this region. Deviations between model-calculated estimate and the estimate based on measured tracer data over the Mediterranean and over the Southern Red Sea could be linked to  $NO_x$  being overestimated in the model in these regions." I'm not following. There is a low net ozone production rate. which to me implies that the model has a too low  $NO$  concentration, but you say that the model overpredicts  $NO_x$ .

As demonstrated in Figure 4, the model overpredicts the  $NO_x$  measurement over the Mediterranean and the Southern Red Sea. As these regions are classified as rather  $NO_x$

sensitive regimes (see Figure 10), higher  $\text{NO}_x$  (in the model) will likewise imply higher NOPR (under stagnant chemistry, i.e.  $\text{NO}_x$  sensitivity). The text is not fully clear and will be rewritten on P. 23 L502-505 as: Although EMAC predicts high ozone levels over the Arabian Sea, it also reports the lowest NOPR in this region. On the other side, the large overestimation of the model-calculated estimate NOPR against the one based on measured tracer data over the Mediterranean and over the Southern Red Sea could be linked to  $\text{NO}_x$  being overestimated in these regions.

Comment 15: Section 3.4 VOC and  $\text{NO}_x$  sensitivity. Makes sense.

We have changed the title of chapter 3.4 to VOC- and  $\text{NO}_x$ -sensitivity.
